# Supplementary figures and images for: Markov state models of proton- and pore-dependent activation in a pentameric ligand-gated ion channel
Source: eLife journal article supplement (doi:10.7554/elife.68369), 2021-10-15

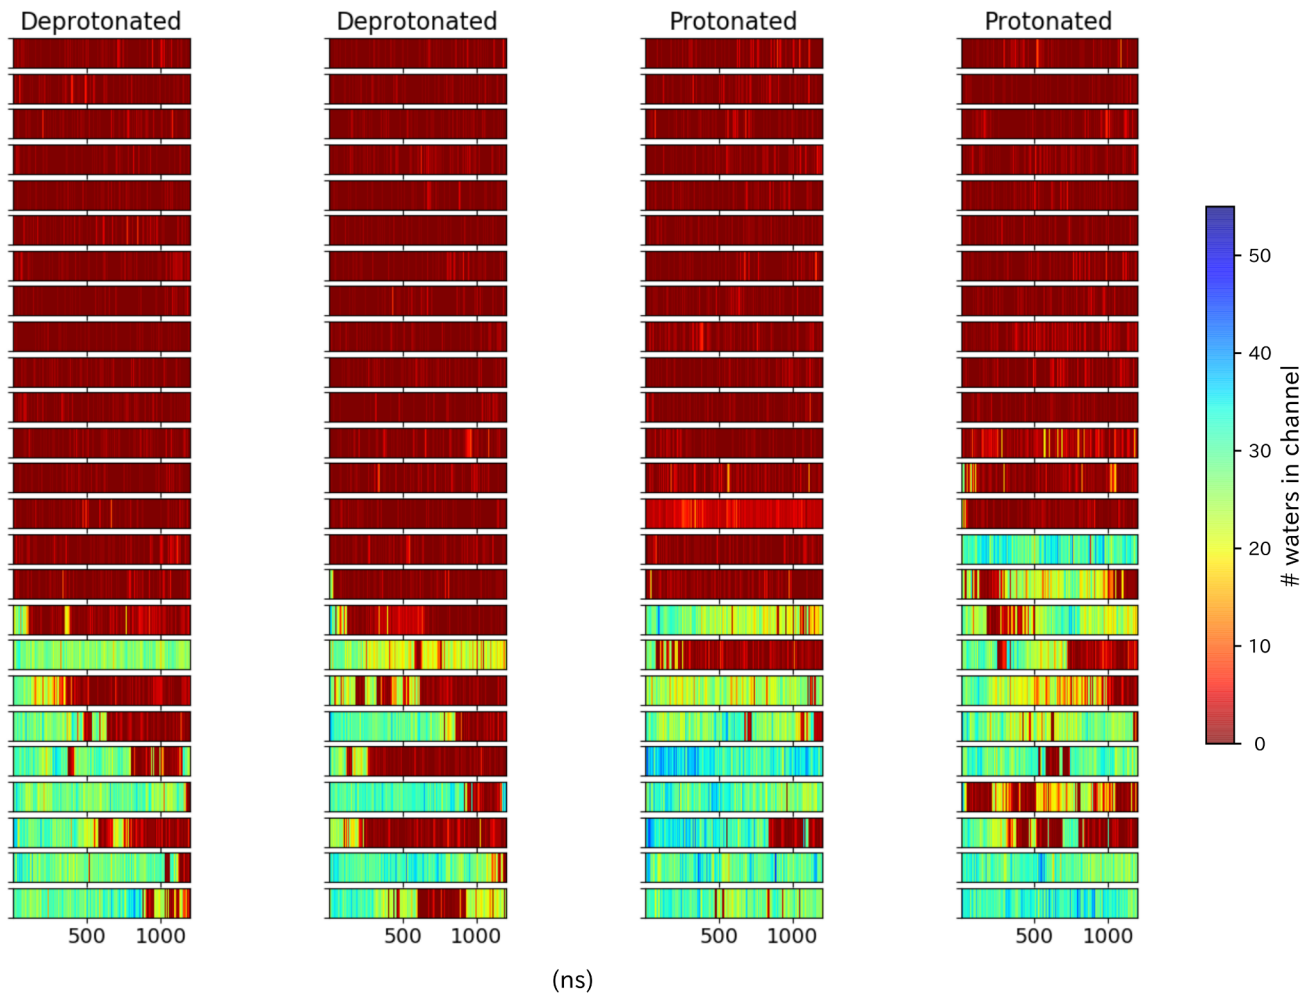

Supplement: supp [file elife-68369-supp-v1.zip]

Wild-Type

A

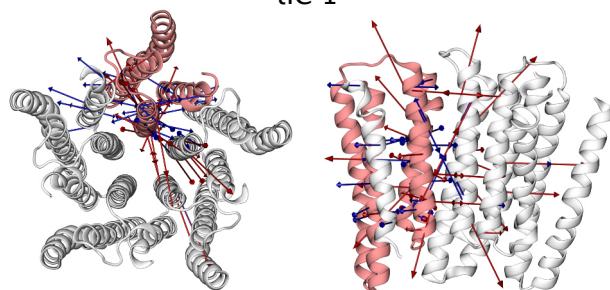

B

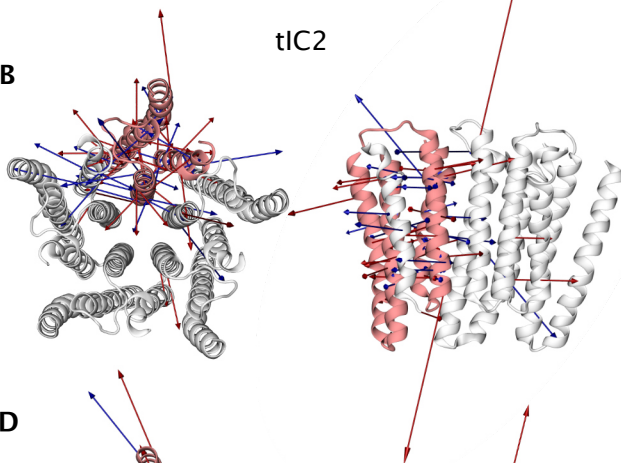

C

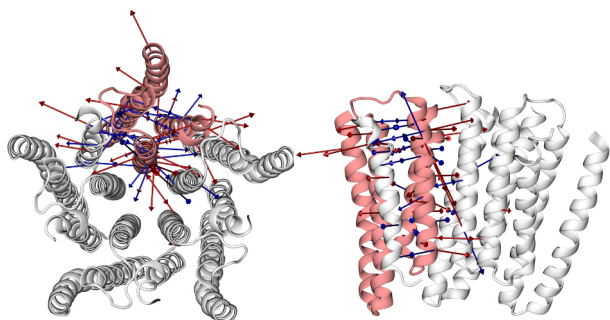

D

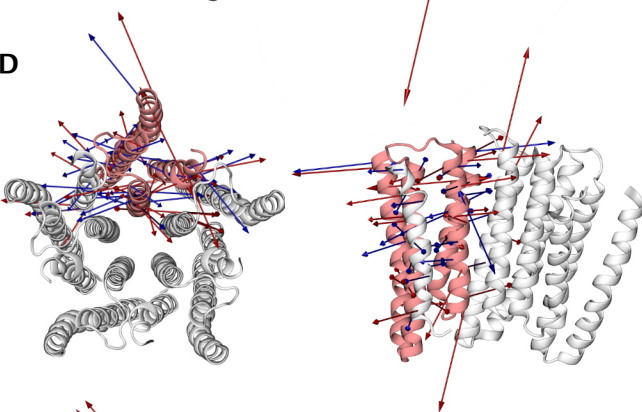

E

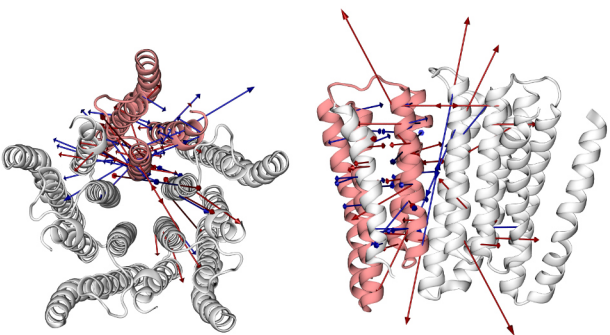

F

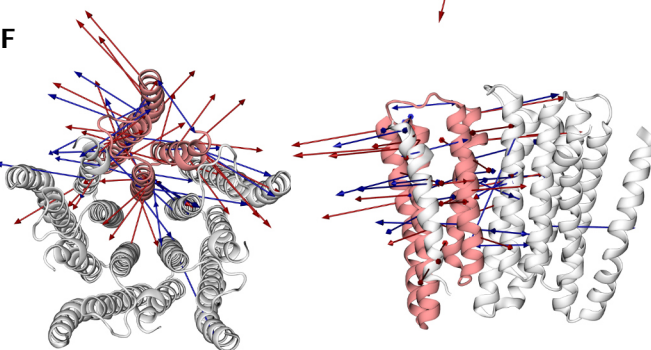  
Deprotonated  
Protonated

Supplement: supp [file elife-68369-supp-v1.zip]

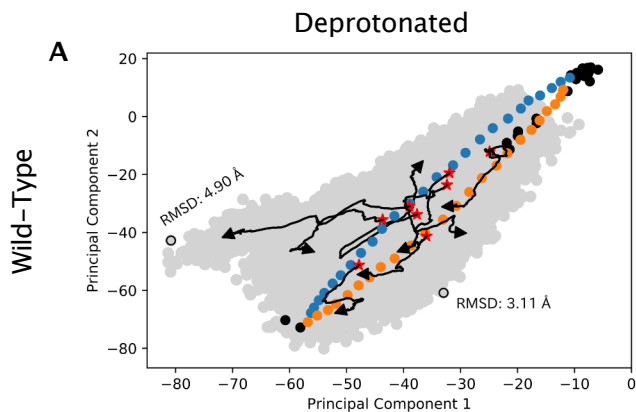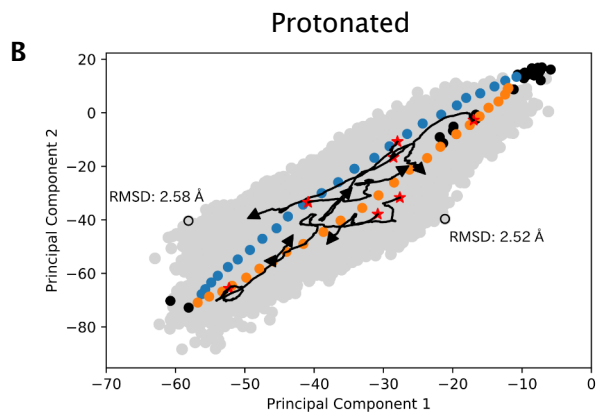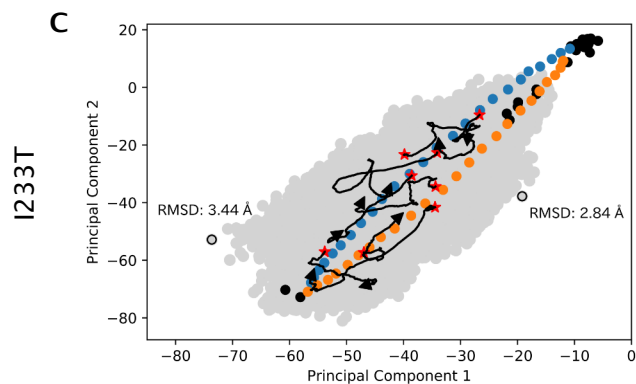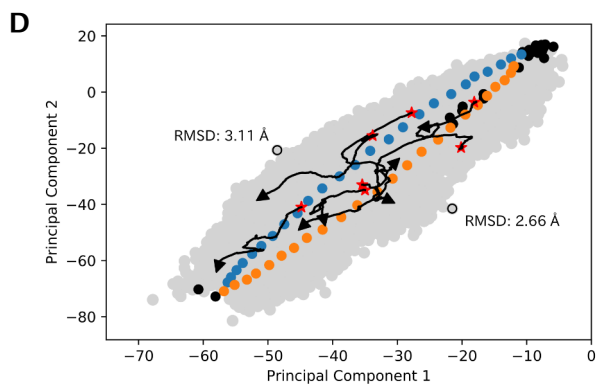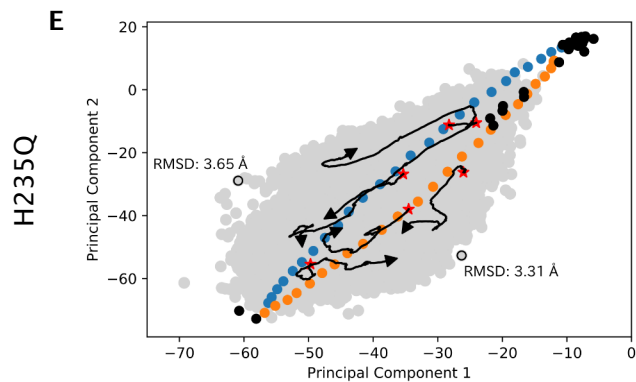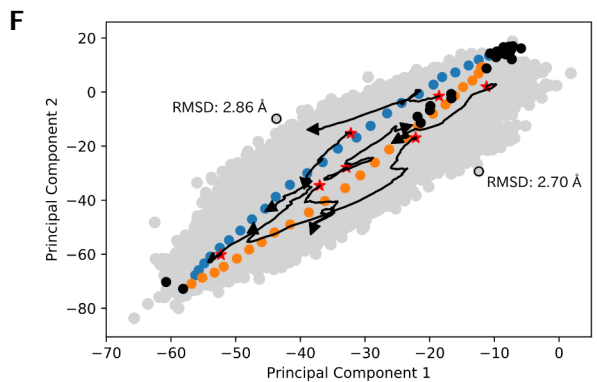

Supplement: supp [file elife-68369-supp-v1.zip]

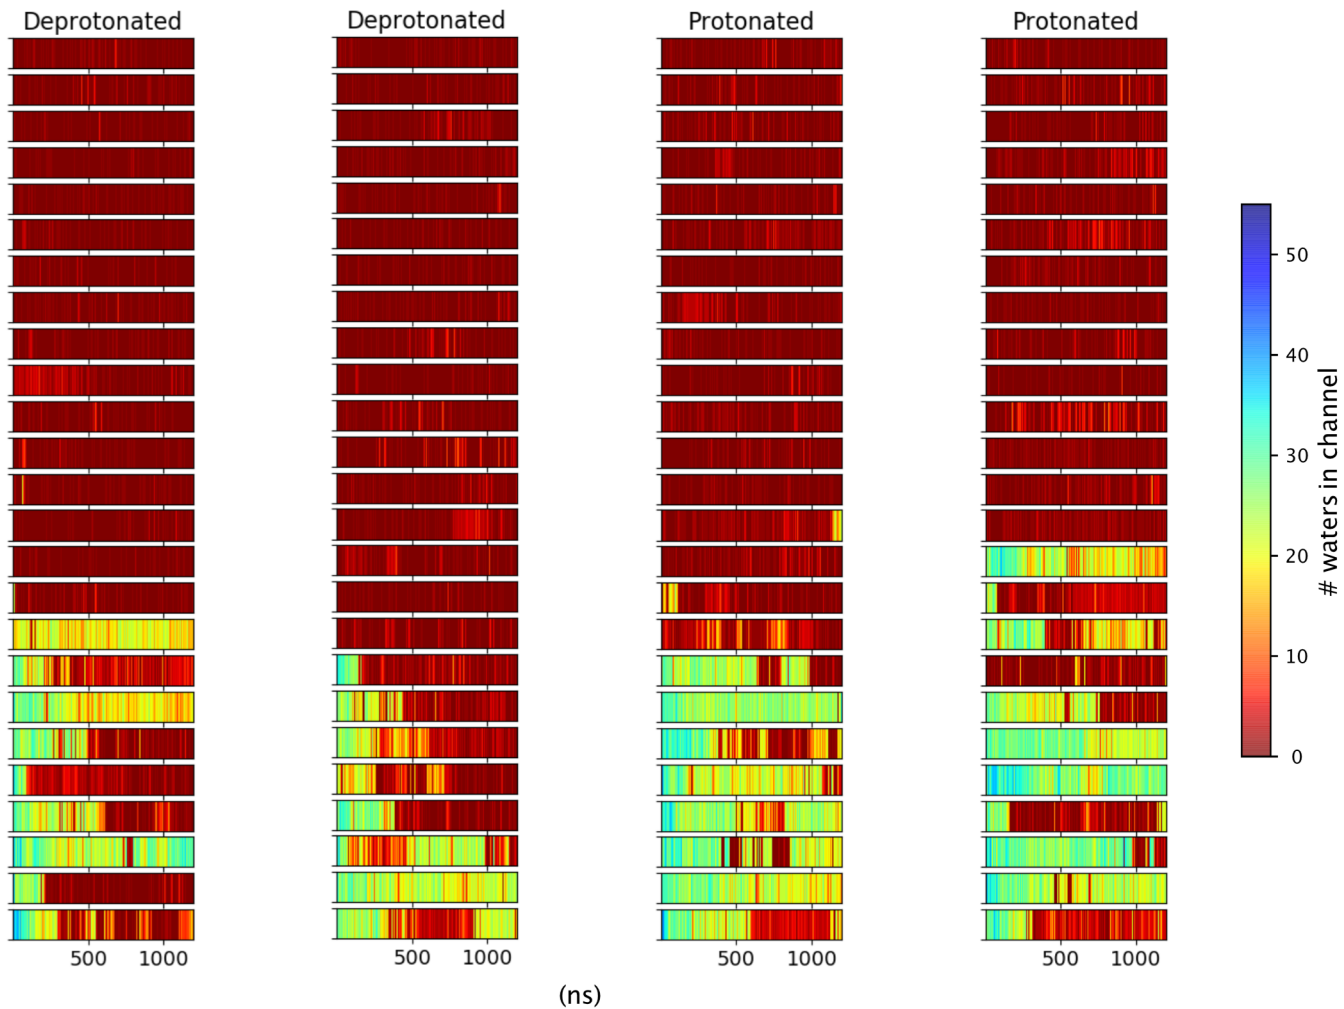

Supplement: supp [file elife-68369-supp-v1.zip]

Deprotonated

Protonated

Wild-Type

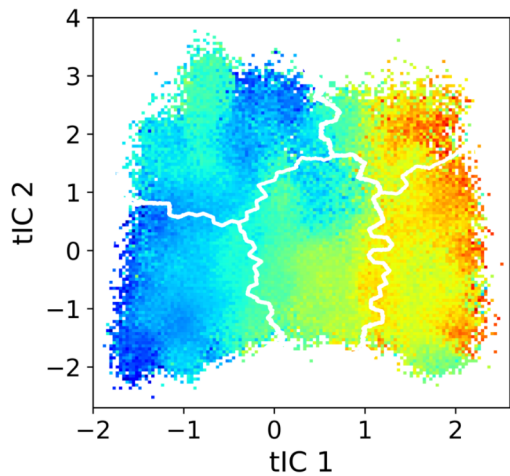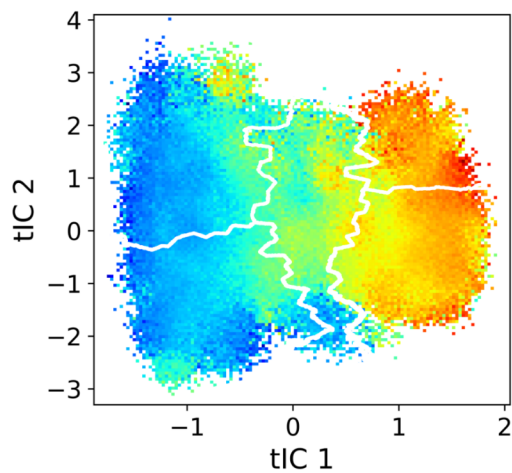

I233T

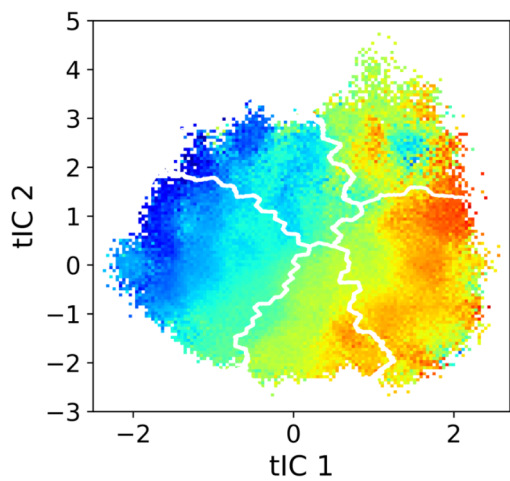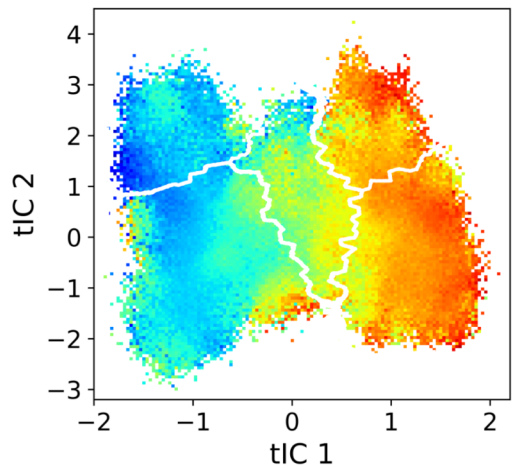

H235Q

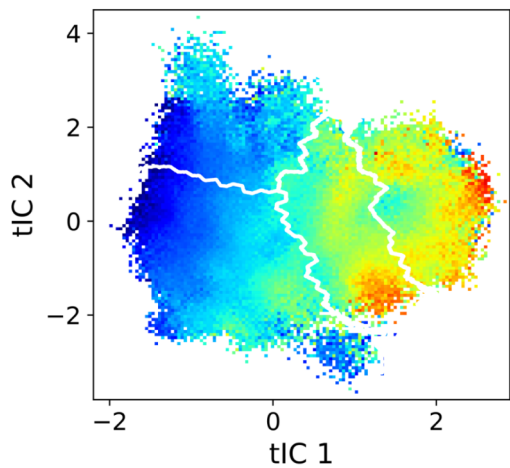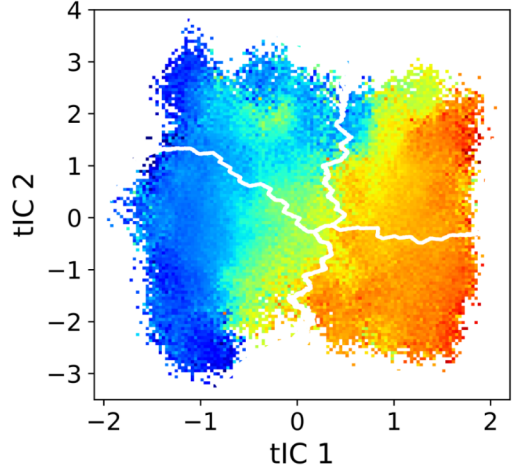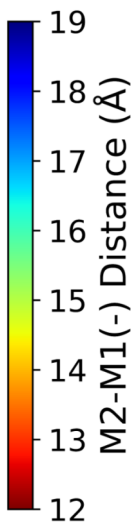

Supplement: supp [file elife-68369-supp-v1.zip]

Deprotonated

Protonated

Wild-Type

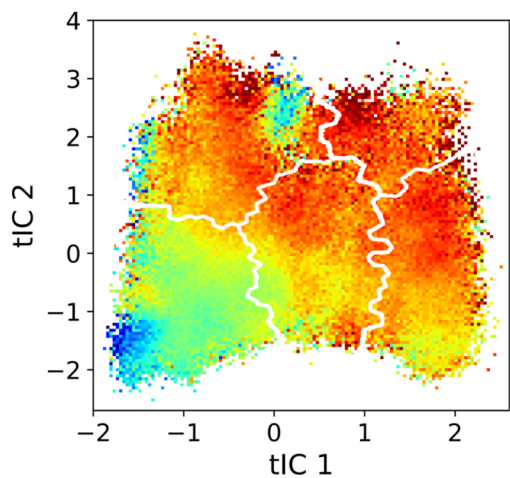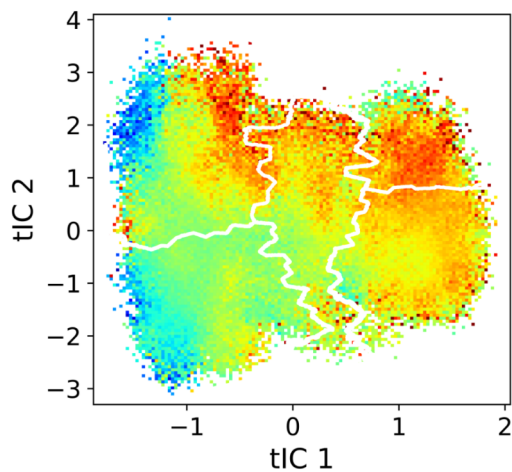

I233T

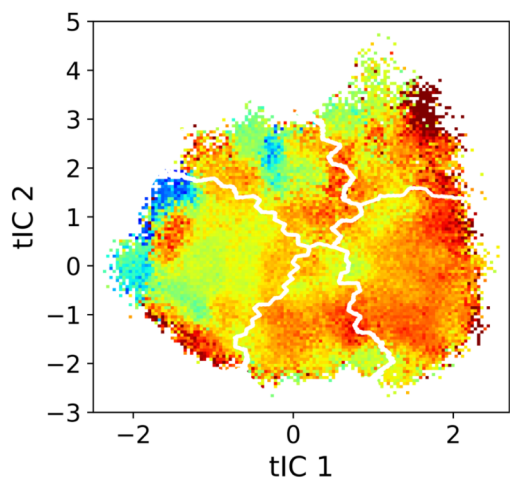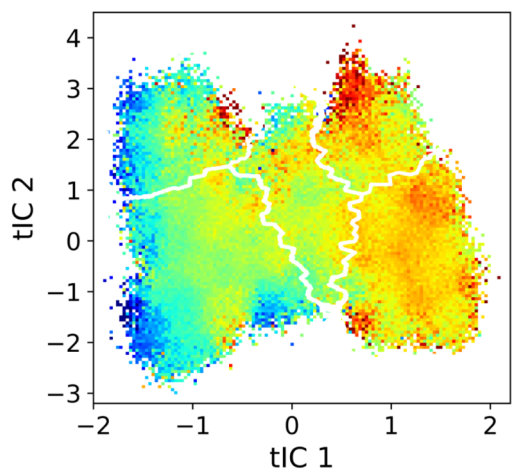

H235Q

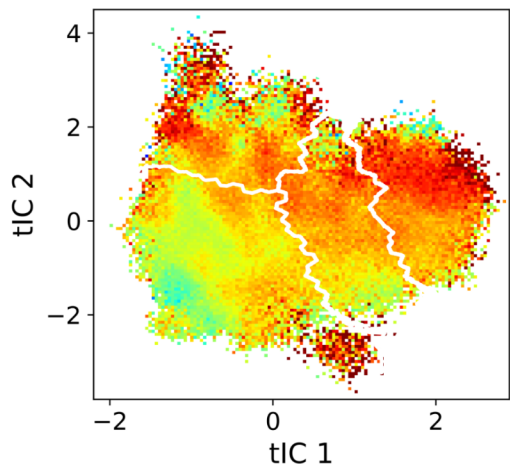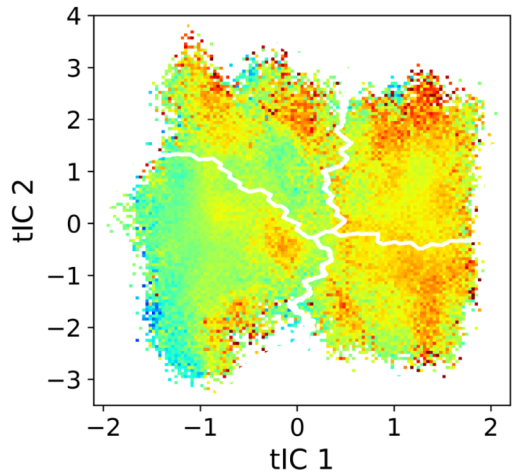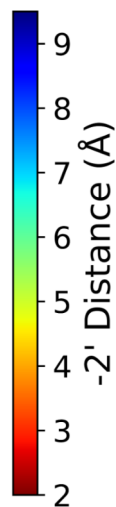

Supplement: supp [file elife-68369-supp-v1.zip]

Deprotonated

Protonated

Wild-Type

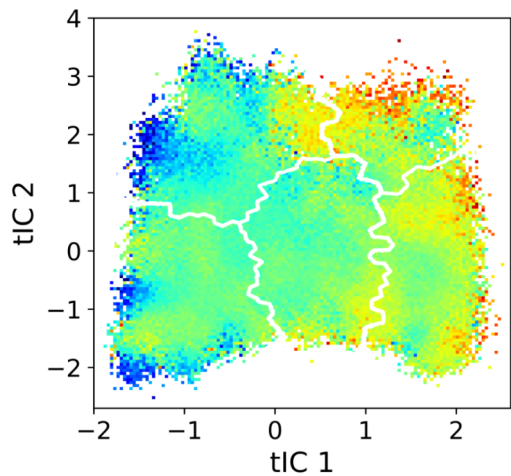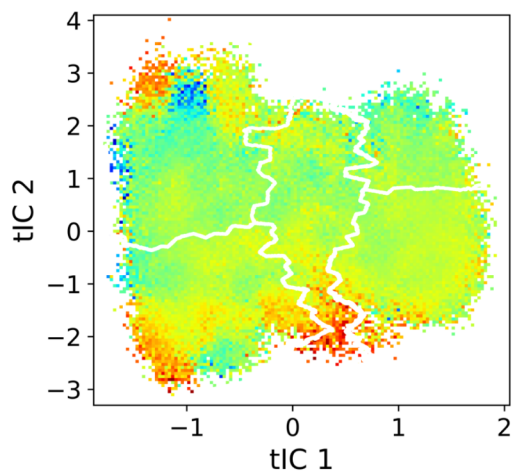

I233T

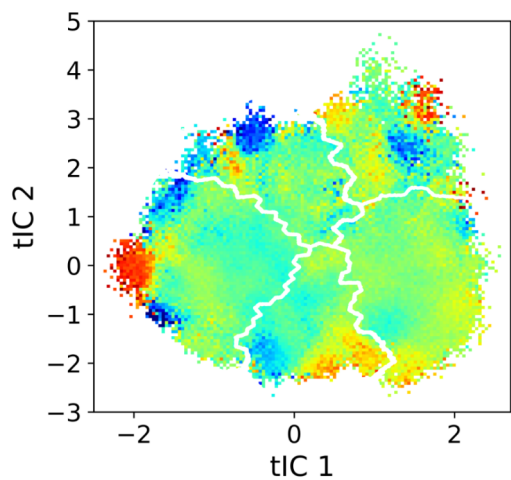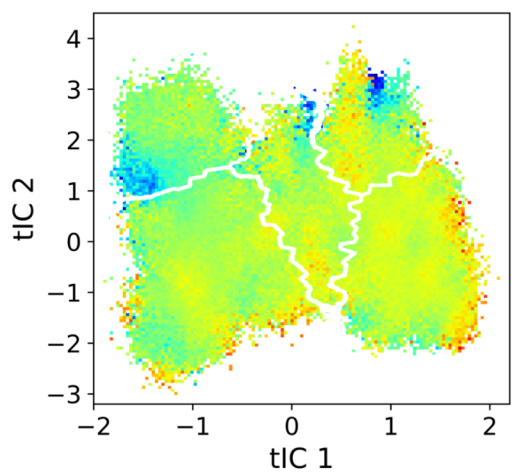

H235Q

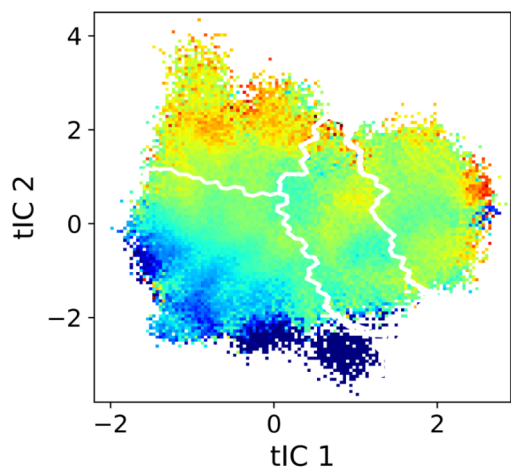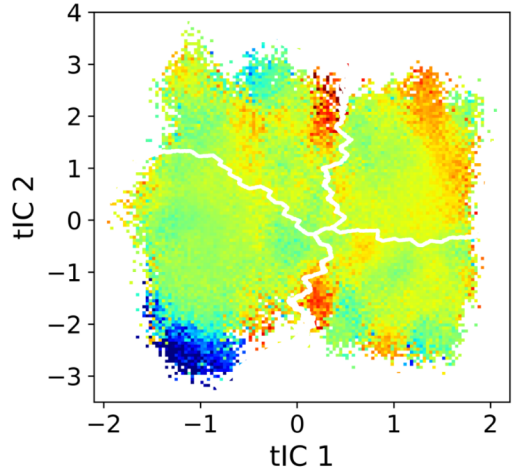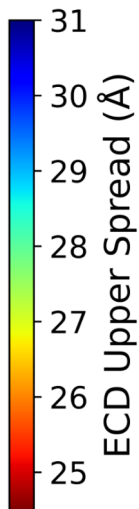

Supplement: supp [file elife-68369-supp-v1.zip]

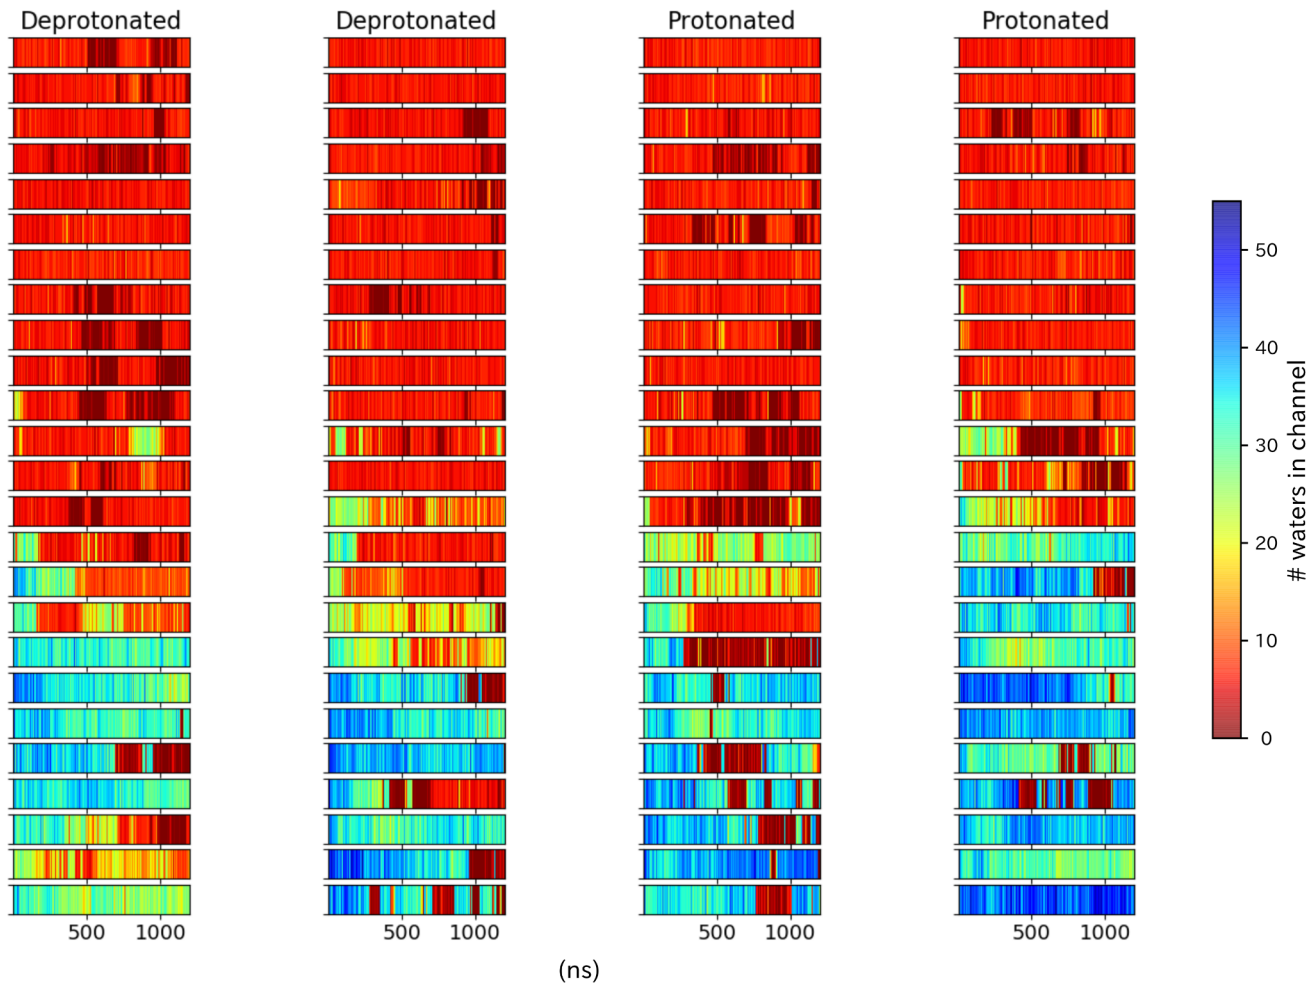

Supplement: supp [file elife-68369-supp-v1.zip]

Deprotonated

Protonated

Wild-Type

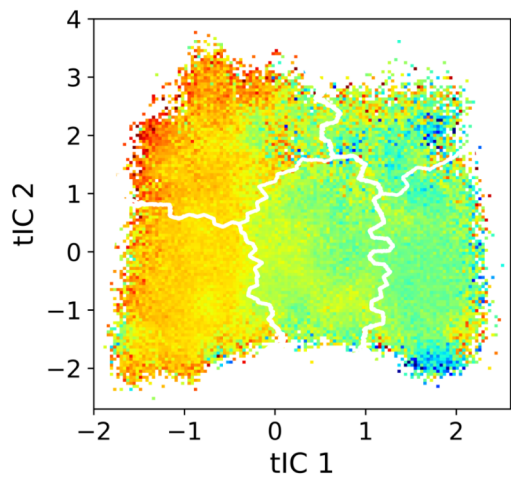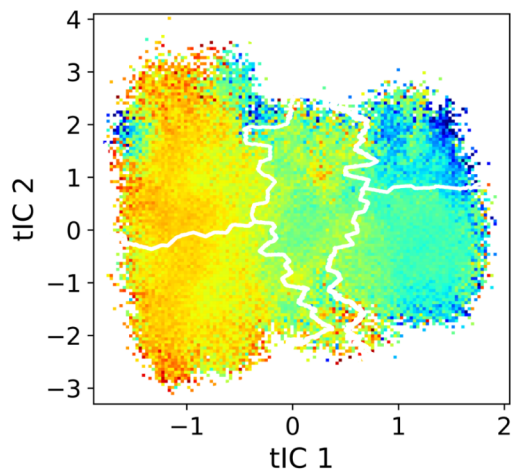

I233T

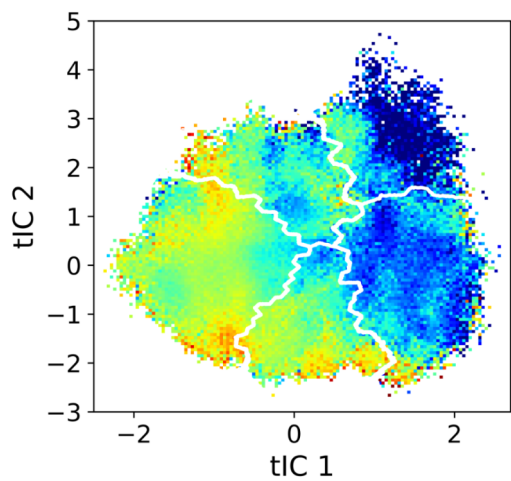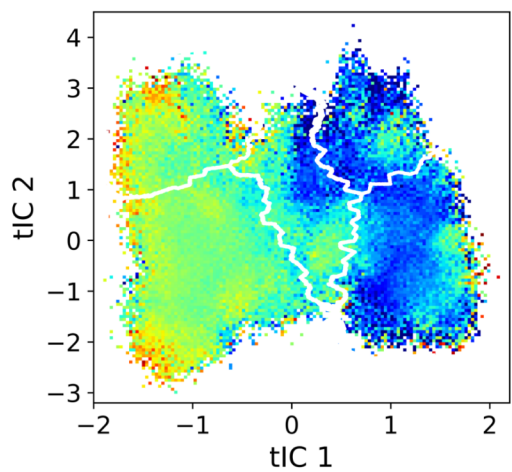

H235Q

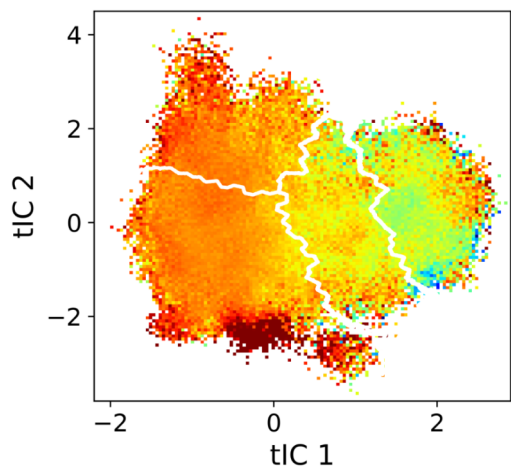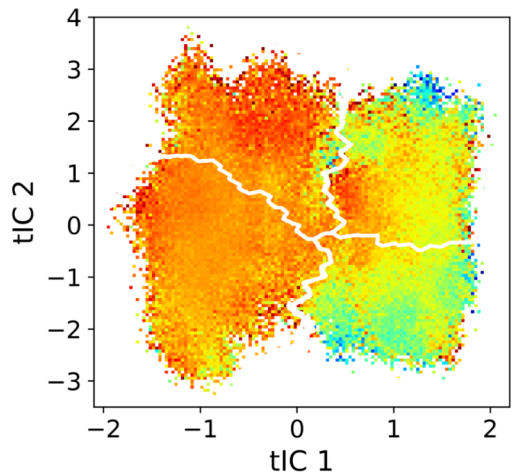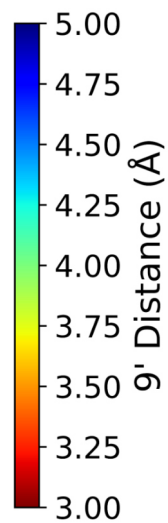

Supplement: supp [file elife-68369-supp-v1.zip]

Deprotonated

Protonated

Wild-Type

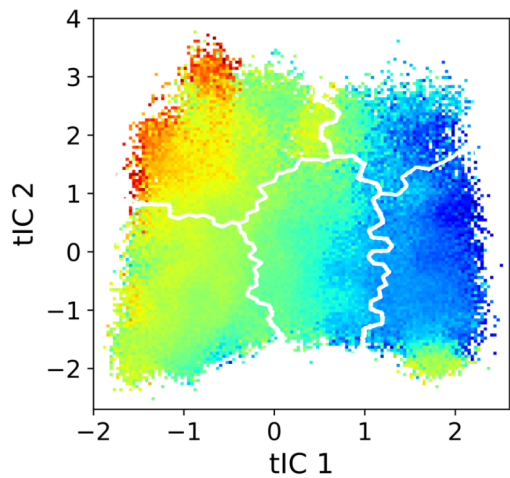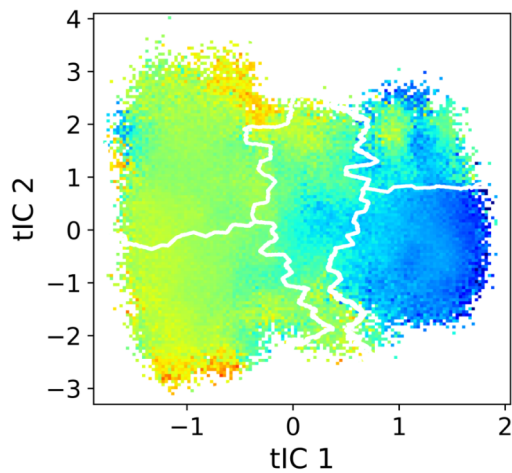

I233T

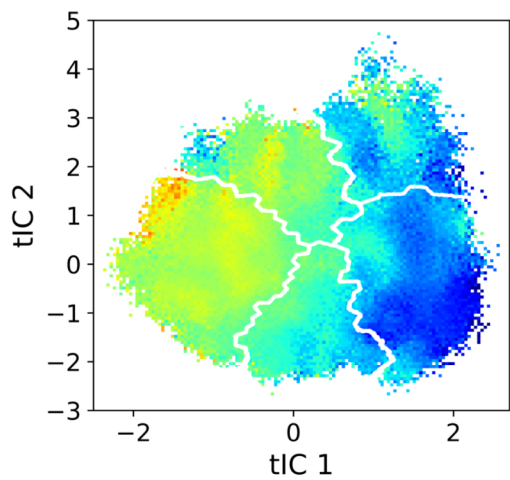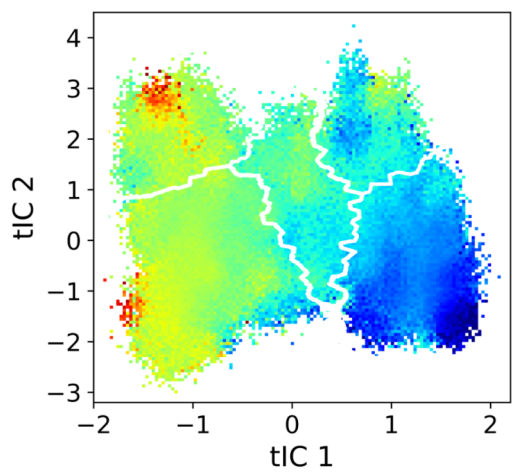

H235Q

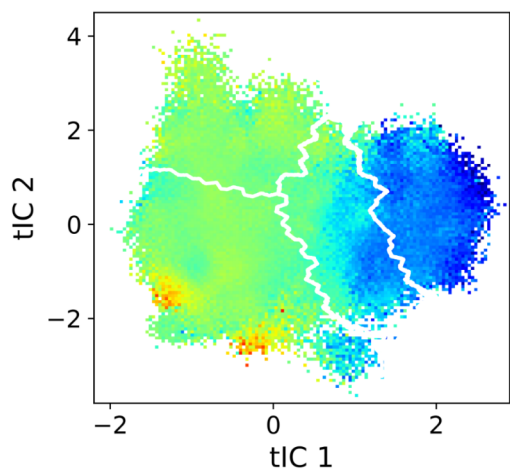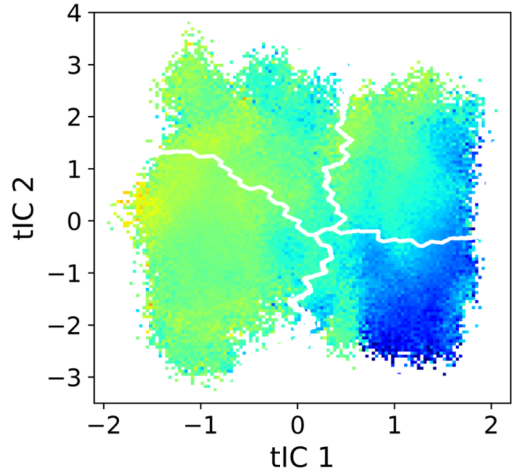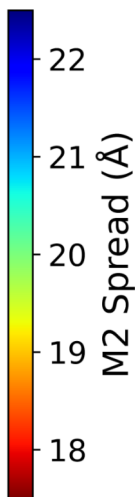

Supplement: supp [file elife-68369-supp-v1.zip]

Deprotonated

Protonated

Wild-Type

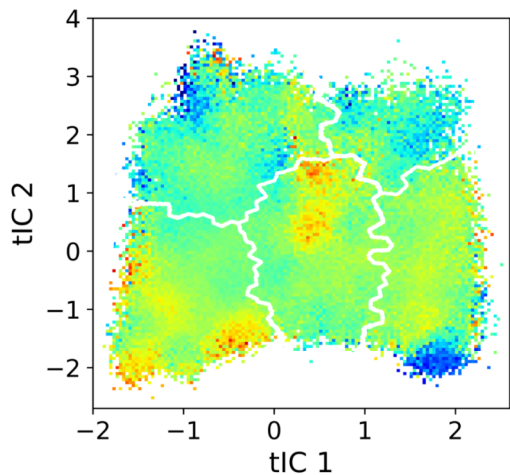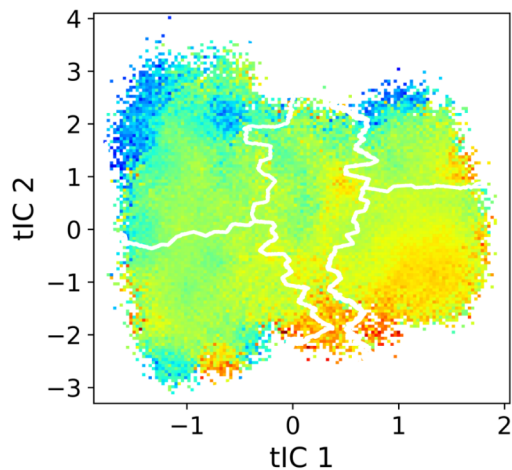

I233T

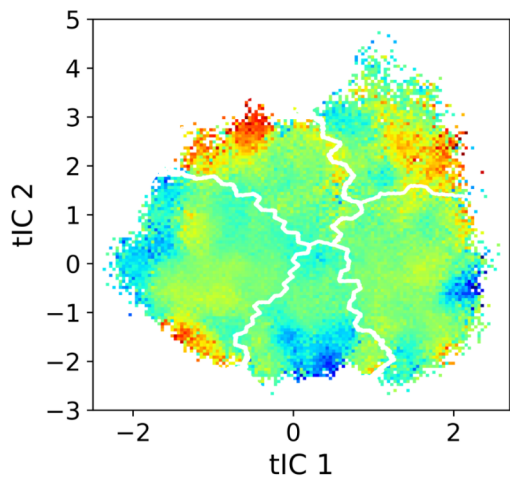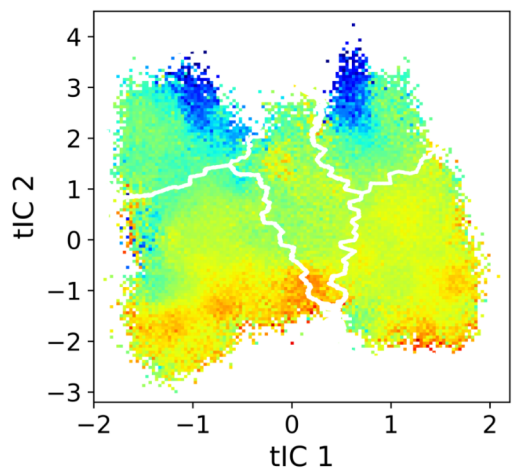

H235Q

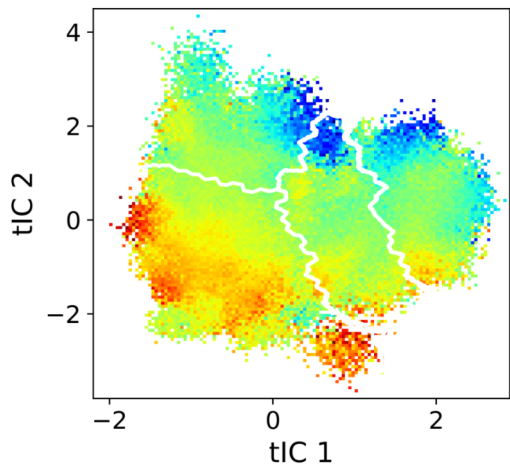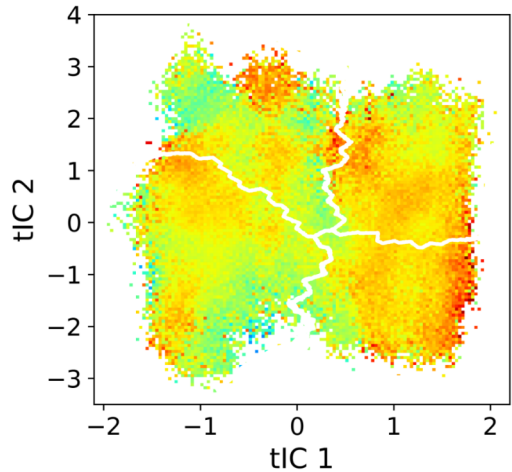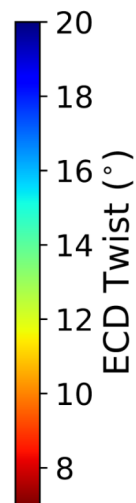

Supplement: supp [file elife-68369-supp-v1.zip]

Deprotonated

Protonated

Wild-Type

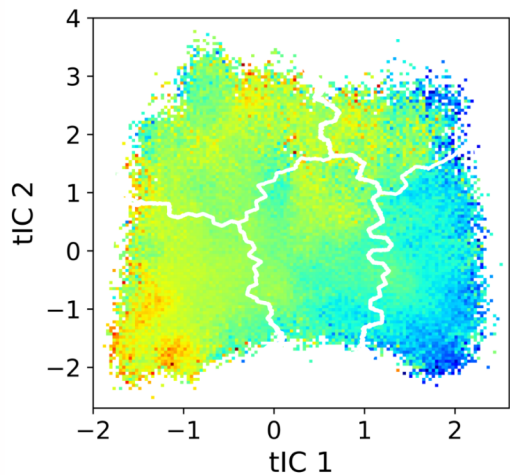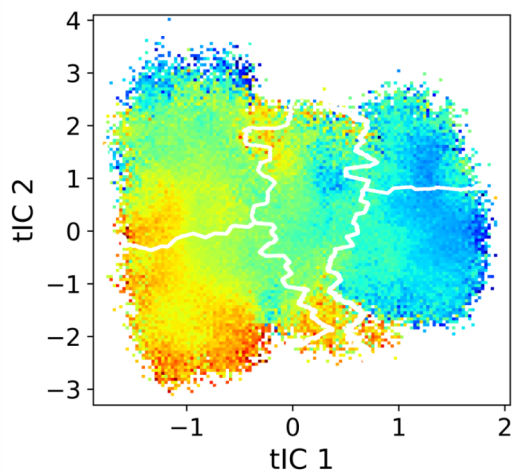

I233T

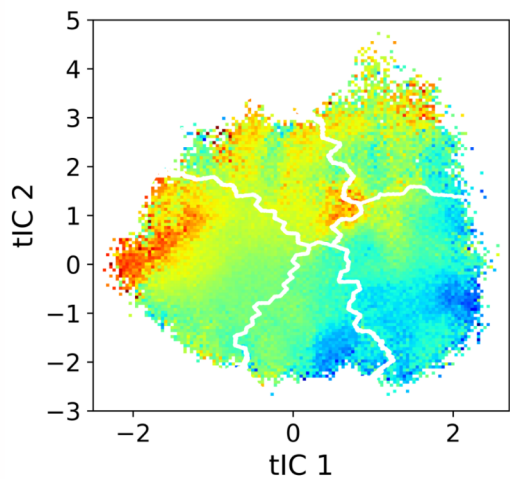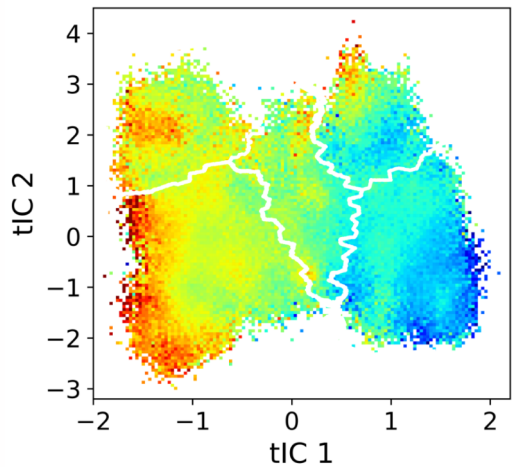

H235Q

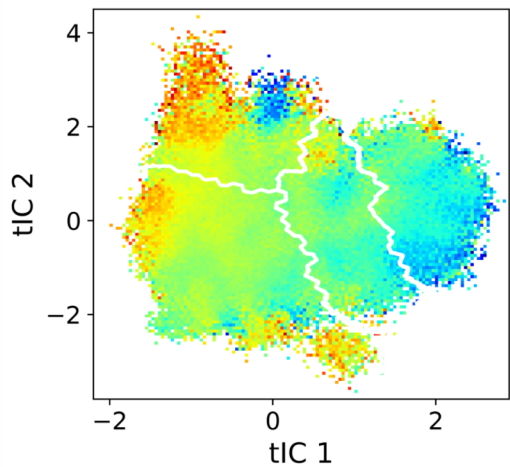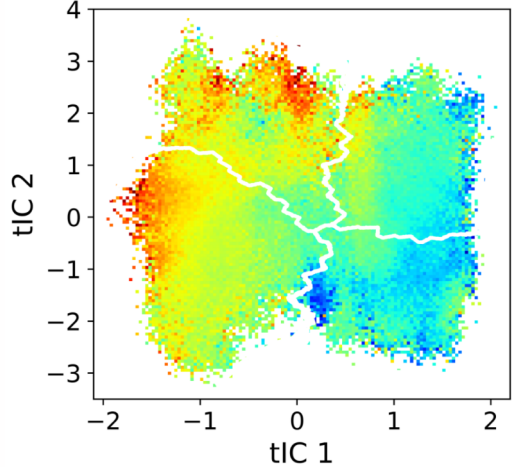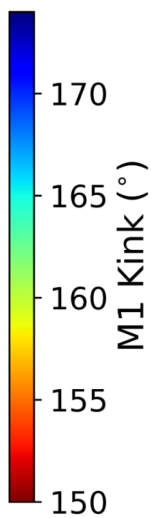

Supplement: supp [file elife-68369-supp-v1.zip]

Deprotonated

ECD Upper Spread (Å)

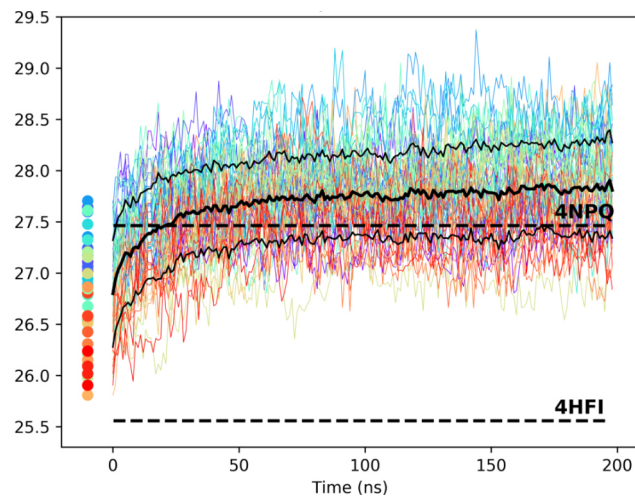

Protonated

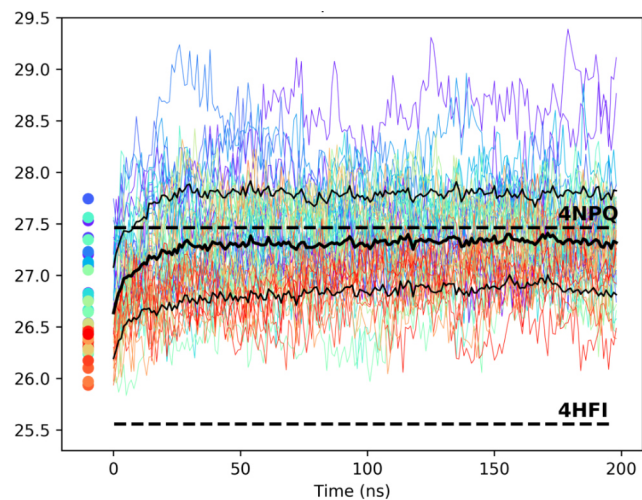

ECD Twist (°)

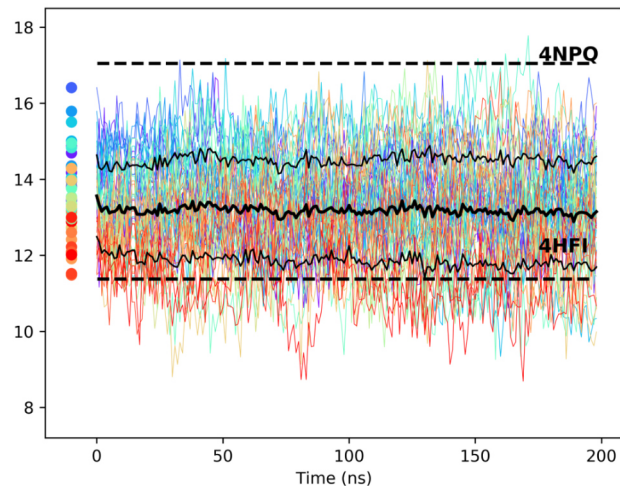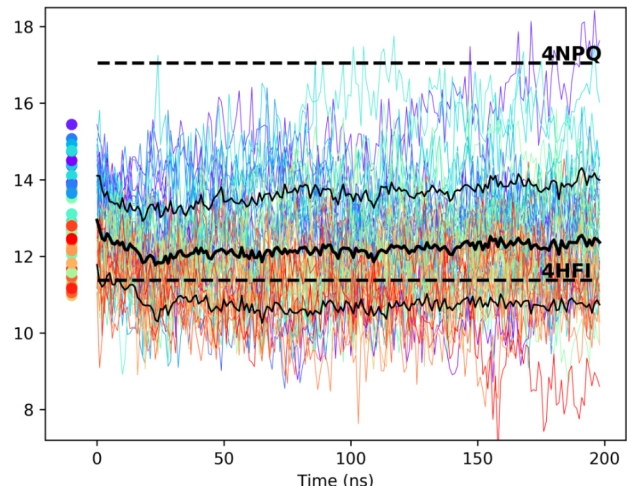

Supplement: supp [file elife-68369-supp-v1.zip]

Deprotonated

Protonated

Wild-Type

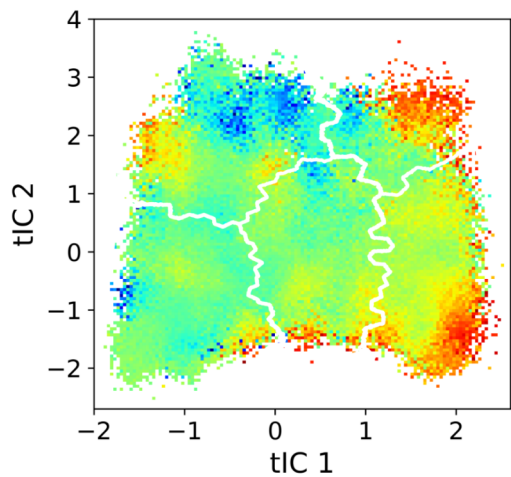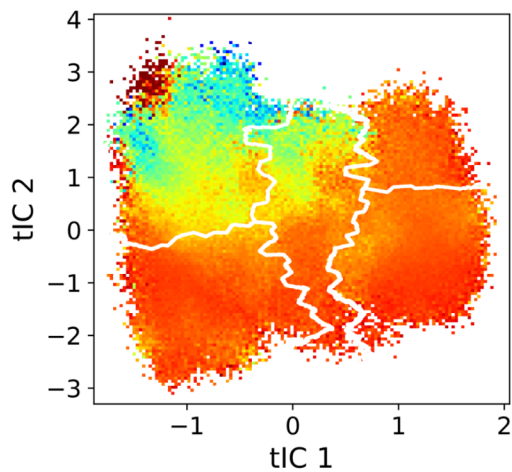

I233T

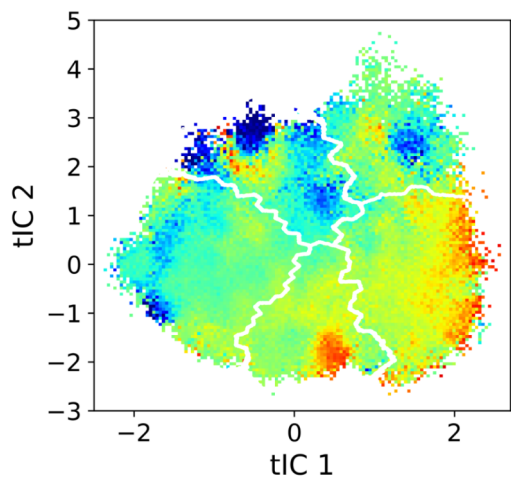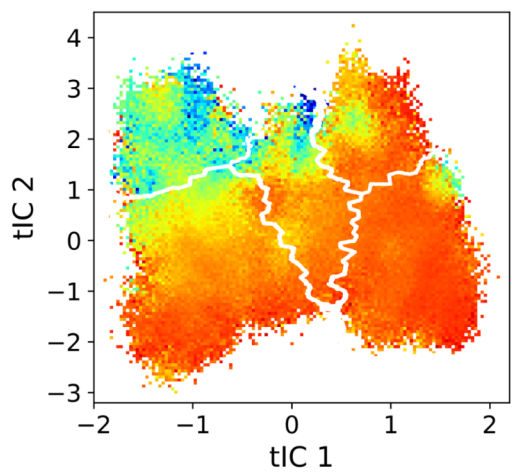

H235Q

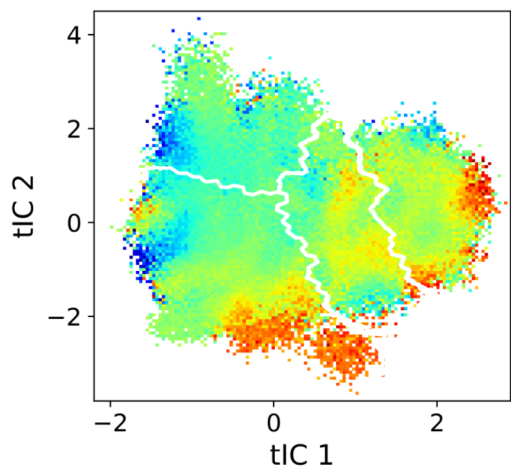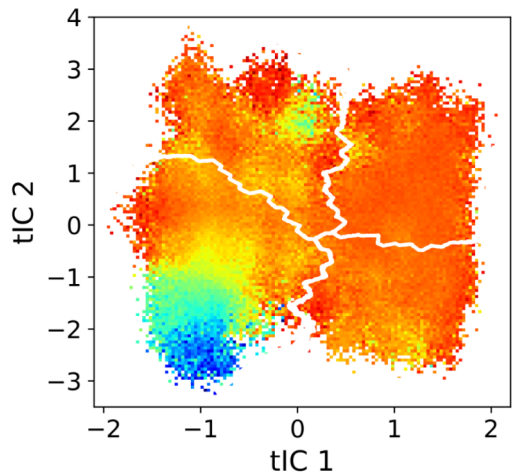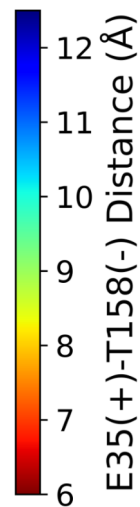

Supplement: supp [file elife-68369-supp-v1.zip]

Wild-Type

I233T

H235Q

A

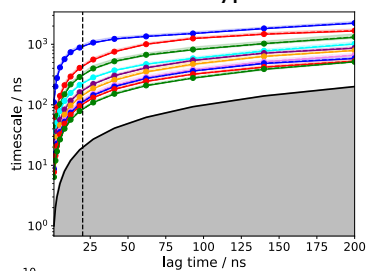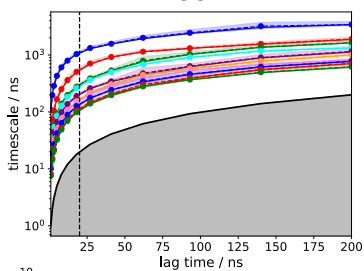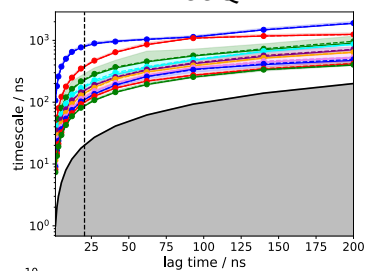

B

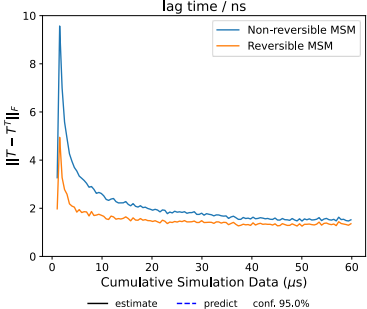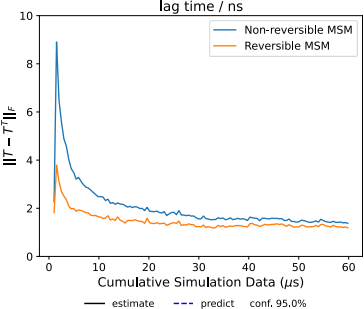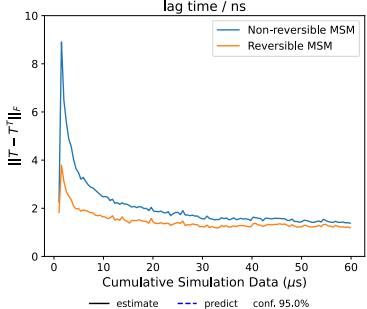

C

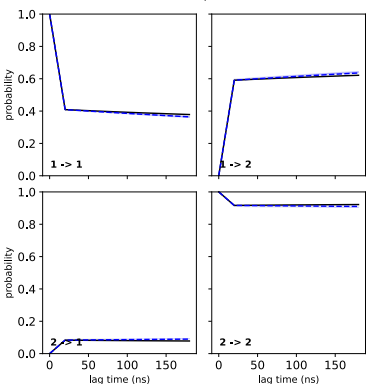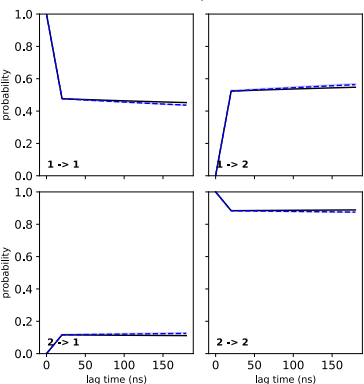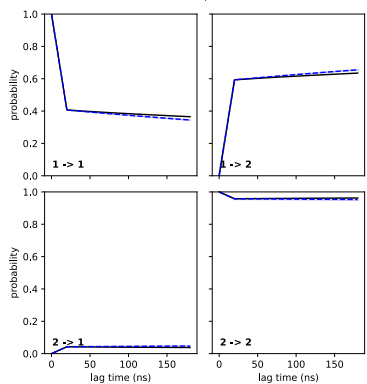

D

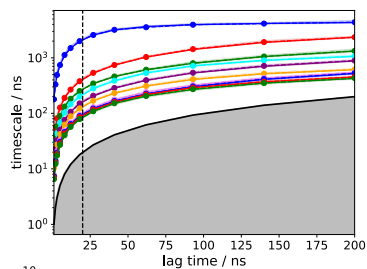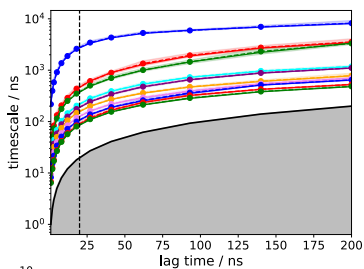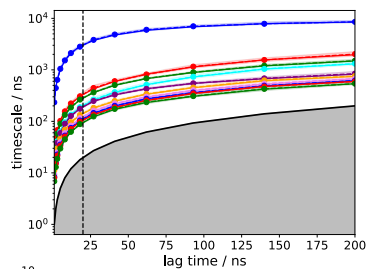

E

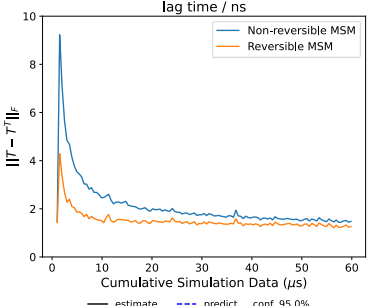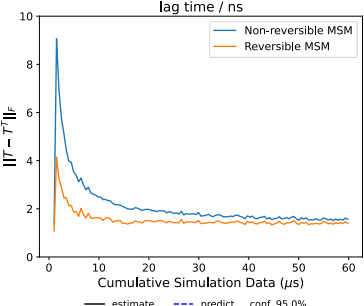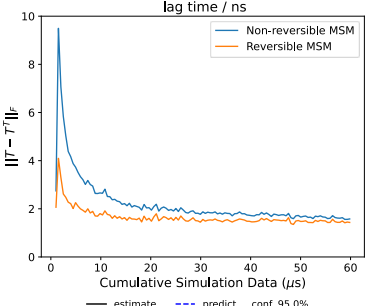

F

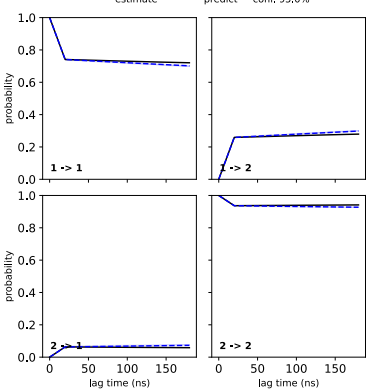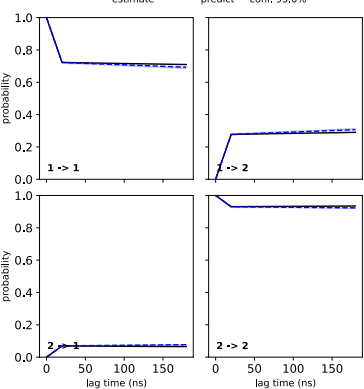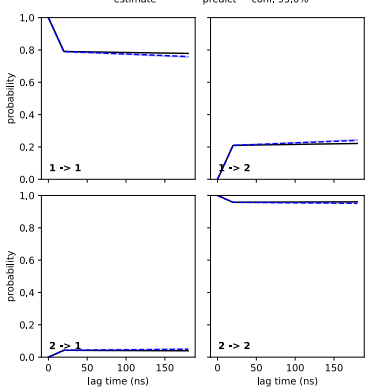

Supplement: supp [file elife-68369-supp-v1.zip]

**A**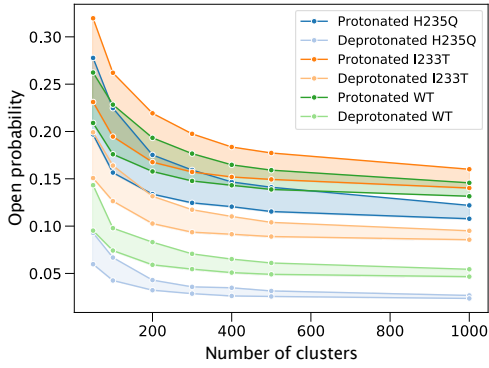**B**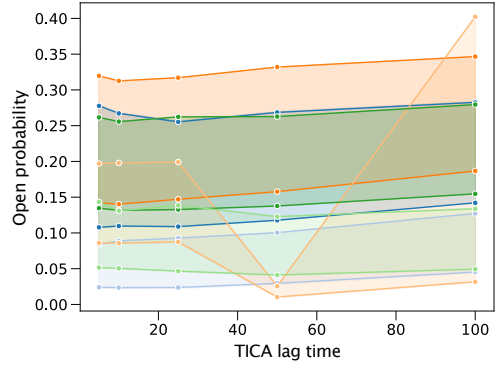**C**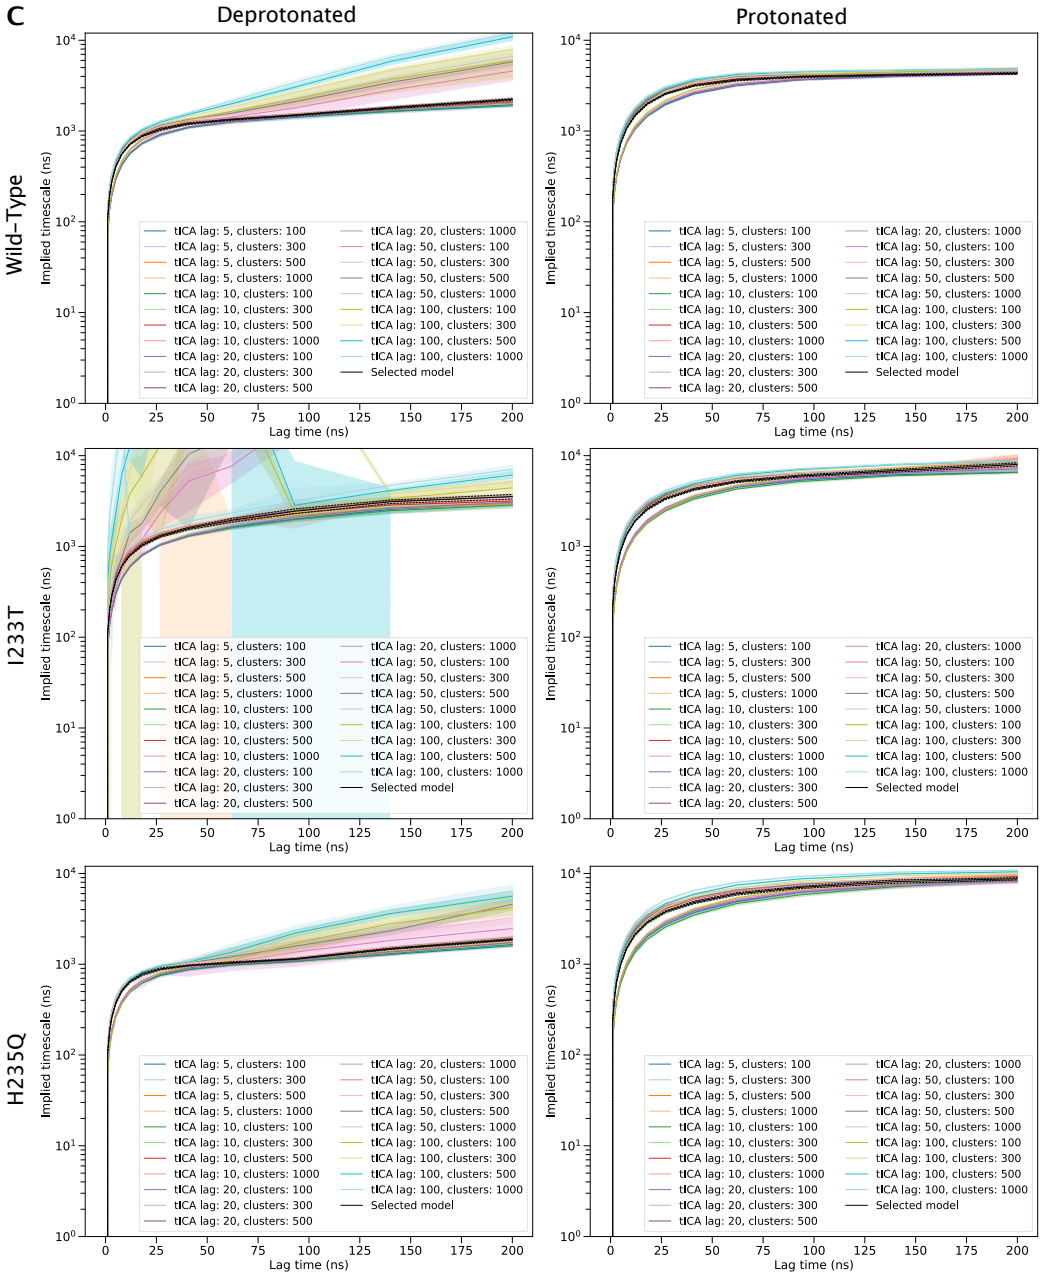

Supplement: supp [file elife-68369-supp-v1.zip]

Deprotonated

Protonated

Wild-Type

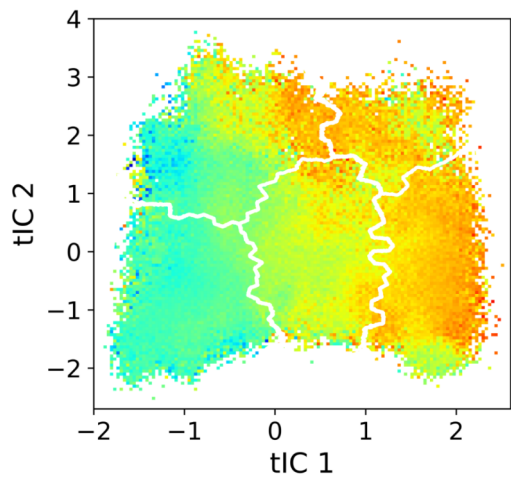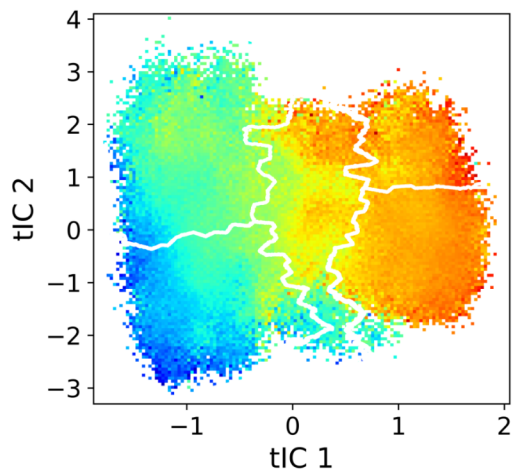

I233T

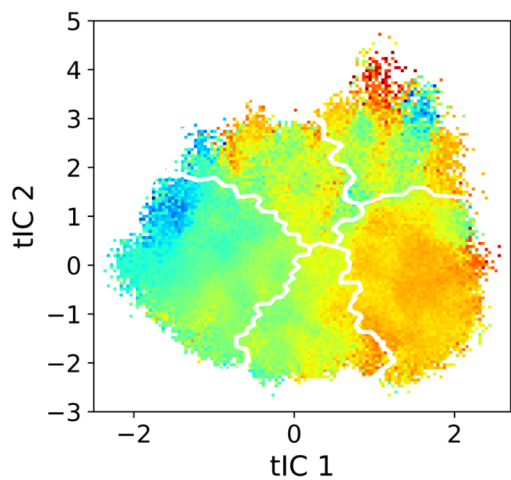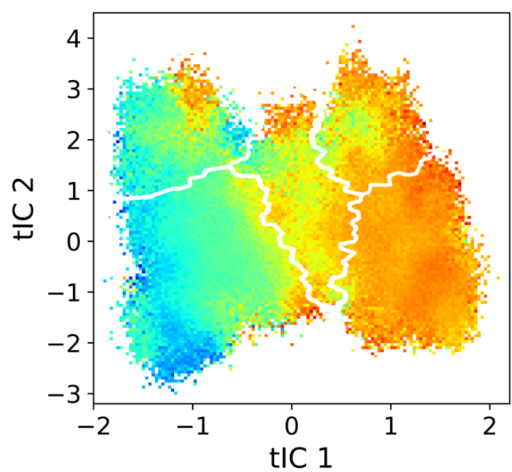

H235Q

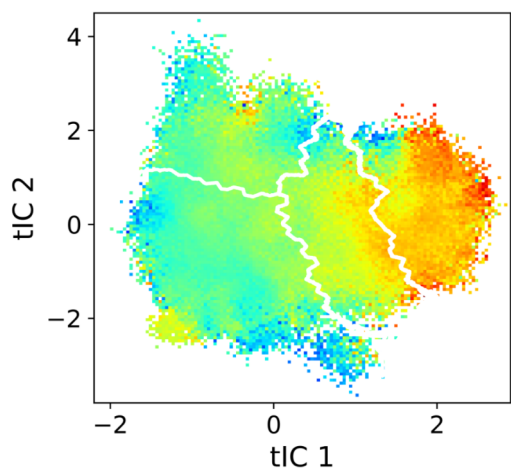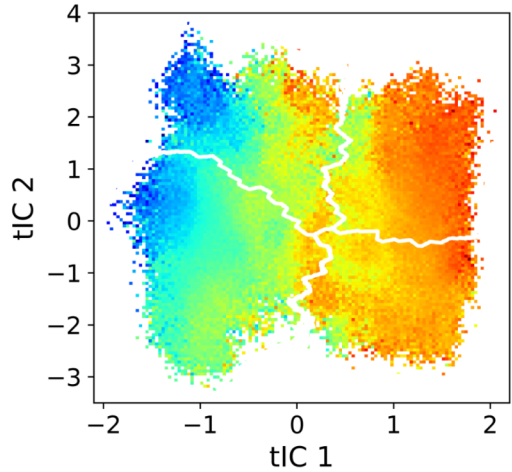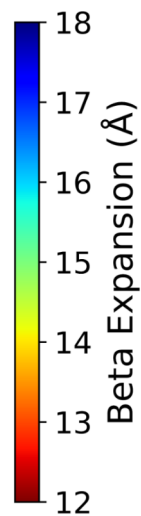

Supplement: supp [file elife-68369-supp-v1.zip]

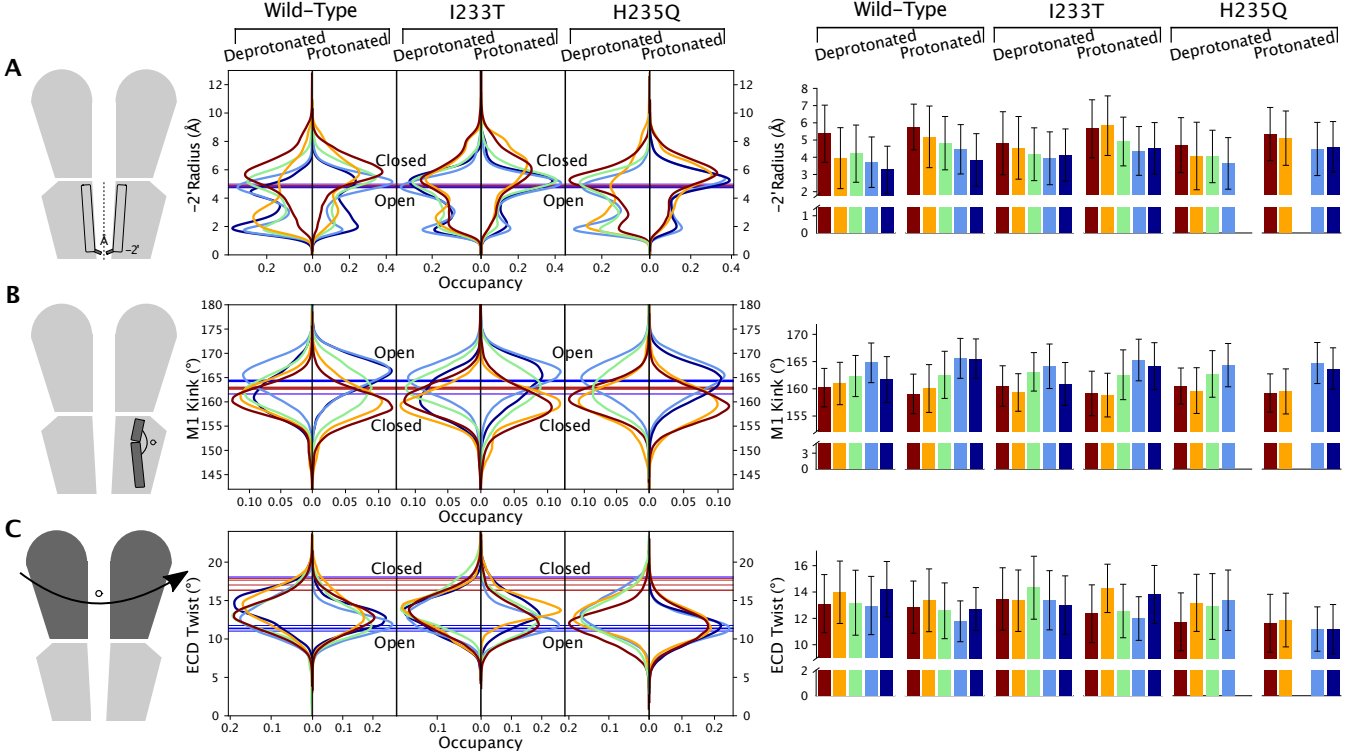

Supplement: supp [file elife-68369-supp-v1.zip]
